# Supplementary material for: Spirometry is not enough to diagnose COPD in epidemiological studies: a follow-up study
Source: PubMed Central journal article supplement (PMC5686137; doi:10.1038/s41533-017-0062-6), 2017-11-14
Supplement: 41533_2017_62_MOESM1_ESM.pdf [file 41533_2017_62_MOESM1_ESM.pdf]

Supplementary table 1. Comparison of the shift in diagnosis from obstructive to non-obstructive after the final assessment, in four different groups of patients, stratified by their *baseline* GOLD stage label.

|                                     | Total number of participants with a diagnosis of AO at baseline<br>(n= 102) | Still obstructive after the second assessment<br>(n= 62) | Non-obstructive after the second assessment<br>(n = 40) |
|-------------------------------------|-----------------------------------------------------------------------------|----------------------------------------------------------|---------------------------------------------------------|
| GOLD 1 ( $FEV_1 \geq 80\%$ )        | 43 (42.2%)                                                                  | 19 (30.6%)                                               | 24 (60%)                                                |
| GOLD 2 ( $50\% \leq FEV_1 < 80\%$ ) | 50 (49.0%)                                                                  | 35 (56.5%)                                               | 15 (37.5%)                                              |
| GOLD 3 ( $30\% \leq FEV_1 < 50\%$ ) | 8 (7.8%)                                                                    | 7 (11.3%)                                                | 1 (2.5%)                                                |
| GOLD 4 ( $FEV_1 < 30\%$ )           | 1 (2.0%)                                                                    | 1 (1.6%)                                                 | 0                                                       |

GOLD - the Global Strategy for the Diagnosis, Management and Prevention of COPD, Global Initiative for Chronic Obstructive Lung Disease

FEV<sub>1</sub> - Forced expiratory volume in 1 s
