# Supplementary material for: Spirometry is not enough to diagnose COPD in epidemiological studies: a follow-up study
Source: PubMed Central journal article supplement (PMC5686137; doi:10.1038/s41533-017-0062-6), 2017-11-14
Supplement: 41533_2017_62_MOESM2_ESM.pdf [file 41533_2017_62_MOESM2_ESM.pdf]

Supplementary table 2. Baseline characteristics of the participants with and without a diagnostic shift after the second assessment (total n = 102)

|                                                                  | Those who<br>were confirmed<br>to be<br>obstructive<br>during the<br>second<br>assessment<br><br>(n= 62) | Those who<br>shifted to<br>non-<br>obstructive<br>after the<br>second<br>assessment<br><br>(n = 40) | P value          |
|------------------------------------------------------------------|----------------------------------------------------------------------------------------------------------|-----------------------------------------------------------------------------------------------------|------------------|
| Age, mean $\pm$ SD                                               | 59.5 $\pm$ 6.6                                                                                           | 56.4 $\pm$ 8.8                                                                                      | <b>&lt;0.05*</b> |
| Men, %                                                           | 38 (61.3%)                                                                                               | 20 (50%)                                                                                            | 0.36             |
| Smokers (ex-smokers), %                                          | 51 (82.3%)                                                                                               | 28 (70%)                                                                                            | 0.23             |
| Smoking exposure <sup>a</sup> , n (%)                            |                                                                                                          |                                                                                                     |                  |
| Never smoking                                                    | 11 (17.7%)                                                                                               | 13 (32.5%)                                                                                          | 0.14             |
| < 10 pack-years                                                  | 10 (16.1%)                                                                                               | 6 (15%)                                                                                             | 0.90             |
| $\geq$ 10 and < 20 pack-years                                    | 5 (8.1%)                                                                                                 | 5 (12.5%)                                                                                           | 0.70             |
| Smoking 20+ pack/years                                           | 36 (58.1%)                                                                                               | 16 (40%)                                                                                            | 0.11             |
| Dusty job, $\geq$ 10 years, n (%)                                | 14 (23.7%)                                                                                               | 13 (34.2%)                                                                                          | 0.31             |
| Gas (fumes) job $\geq$ 10 years, n (%)                           | 17 (28.8%)                                                                                               | 13 (34.2%)                                                                                          | 0,32             |
| Symptoms at the baseline study                                   |                                                                                                          |                                                                                                     |                  |
| Any cough, n (%)                                                 | 36 (58.1%)                                                                                               | 23 (59%)                                                                                            | 0.91             |
| Any dyspnea, n (%)                                               | 37 (59.7%)                                                                                               | 21 (53.8%)                                                                                          | 0.71             |
| All 3 chronic respiratory symptoms together <sup>b</sup> , n (%) | 20 (32.3%)                                                                                               | 7 (17.9%)                                                                                           | 0,17             |
| Family history of asthma, n (%)                                  | 3 (4.8%)                                                                                                 | 6 (15.4%)                                                                                           | 0.14             |
| FEV1 (L), post BD baseline, mean $\pm$ SD                        | 2.19 $\pm$ 0.72                                                                                          | 2.56 $\pm$ 0.72                                                                                     | <b>&lt;0.05*</b> |
| FVC (L), post BD baseline, mean $\pm$ SD                         | 3.62 $\pm$ 1.04                                                                                          | 3.84 $\pm$ 1.00                                                                                     | 0.29             |
| FEV1/FVC, post BD baseline, mean $\pm$ SD                        | 60.3 $\pm$ 9.3                                                                                           | 66.3 $\pm$ 3.40                                                                                     | <b>&lt;0.01*</b> |
| BMI, kg/m2, mean $\pm$ SD                                        | 26.9 $\pm$ 5.1                                                                                           | 26.8 $\pm$ 5.7                                                                                      | 0.93             |
| Current respiratory disease (as reported by the patient)         |                                                                                                          |                                                                                                     |                  |
| Asthma, n (%)                                                    | 16 (26.2%)                                                                                               | 4 (10.3%)                                                                                           | 0.09             |

|                                 |            |            |         |
|---------------------------------|------------|------------|---------|
| Any allergic diseases, n (%)    | 13 (23.3%) | 10 (25.6%) | 0.80    |
| Chronic bronchitis, n (%)       | 21 (34.4%) | 3 (7.7%)   | <0.01** |
| COPD, n (%)                     | 14 (23%)   | 0 (0%)     | <0.01** |
| Any respiratory diseases, n (%) | 34 (55.7%) | 6 (15.4%)  | <0.01** |

---

Figures are means  $\pm$  SD unless indicated otherwise.

<sup>a</sup> One pack-year of smoking indicates that an individual smoked one package of cigarettes (20 cigarettes) daily for 1 year.

<sup>b</sup> Chronic respiratory symptoms were defined as the presence of chronic cough and chronic phlegm (on most days for as long as 3 months each year), together with chronic dyspnea.

FEV<sub>1</sub> - Forced expiratory volume in 1 s

FVC - Forced vital capacity

FEV<sub>1</sub>/FVC – a ratio of the forced expiratory volume in 1 s to the forced vital capacity

BMI – Body mass index

COPD – Chronic obstructive pulmonary disease

\*Significant differences (P < .05) within the shift group (p-value for one sample t-test)

\*\* Significant differences (P < .05) within the shift group (p-value for Pearson Chi-square test)
